# Supplementary material
Source: ML conference proceedings conference paper supplement (https://openaccess.thecvf.com/content/CVPR2022/html/Kim_Polymorphic-GAN_Generating_Aligned_CVPR_2022_paper.html)
Supplement: Supplementary file 2 [file Kim_Polymorphic-GAN_Generating_Aligned_CVPR_2022_supplemental.zip]

Archive with 4 entries (4 files):
- PMGAN_supplementary_video.mp4
- __MACOSX/._PMGAN_supplementary_video.mp4
- PMGAN_supplementary.pdf
- __MACOSX/._PMGAN_supplementary.pdf
